# Supplementary material for: Isoform‐specific upregulation of FynT kinase expression is associated with tauopathy and glial activation in Alzheimer's disease and Lewy body dementias
Source: PubMed Central journal article supplement (PMC8017997; doi:10.1111/bpa.12917), 2021-01-29
Supplement: BPA-31-253-s001.pdf [file BPA-31-253-s001.pdf]

**Low *et al.* Isoform-specific upregulation of FynT kinase expression is associated with tauopathy and glial activation in Alzheimer's disease and Lewy body dementias**

**Supplementary Table S1. Primers used in real-time PCR reactions**

| <b>Primer Name</b> | <b>Forward primer seq<br/>(5'-3')</b> | <b>Reverse primer seq<br/>(5'-3')</b> | <b>Accession no.<br/>(product size)</b> |
|--------------------|---------------------------------------|---------------------------------------|-----------------------------------------|
| Hs_FynB            | CTGCTGCCGCCTAGTAGTTC                  | GTGTTTCCATTCCAGGTACC                  | NM_002037(168bp)                        |
| Hs_FynT            | CATCGAGTTGTACCCACAA                   | GTGTTTCCATTCCAGGTACC                  | NM_153047(136bp)                        |
| Hs_GFAP            | GGGAGCTTGATTCTCAGCAC                  | AATTGCCTCCTCCTCCATCT                  | NM_002055 (178bp)                       |
| Hs_CD11b           | GCCGGTGAATATGCTGTCT                   | GCGGTCCCATATGACAGTCT                  | NM_001145808(199bp)                     |
| Hs_18S rRNA        | CCTGCGGCTTAATTTGACTC                  | CGTGAGCCAGTCAGTGTAG                   | M10098(310bp)                           |
| Hs_β-actin         | ACTGGAACGGTGAAGGTGAC                  | AGAGAAGTGGGGTGGCTTTT                  | NM_001101(169bp)                        |
| Hs_GAPDH           | TGACATCAAGAAGGTGGTGAAG                | TTACTCCTTGGAGGCCATGTG                 | M33197(241bp)                           |
| Ms FynB            | CTGCTGCCGCCTAGTAGTTC                  | GTATTTCCATTCCAGGTACC                  | NM_001122893(168bp)                     |
| Ms FynT            | CATCAAGTTGTACCCACAA                   | GTATTTCCATTCCAGGTACC                  | NM_008054(136bp)                        |
| Ms GFAP            | TGAGGCAGAAGCTCCAAGAT                  | CACGTGGACCTGCTGTTG                    | NM_001131020(215bp)                     |
| Ms CD11b           | CAGCATCAGTACCAGTTCAACA                | CTGCAACAGAGCAGTTCAGC                  | NM_001082960 (223bp)                    |
| Ms 18S rRNA        | CCTGCGGCTTAATTTGACTC                  | CGCTGAGCCAGTCAGTGTAG                  | NR_003278(319bp)                        |
| Ms GAPDH           | GGCATTGCTCTCAATGACAA                  | TGTGAGGGAGATGCTCAGTG                  | NM_008084(200bp)                        |
| Ms β-actin         | ACTGGAACGGTGAAGGCGAC                  | GAGGGTGAGGGACTTCTGT                   | NM_007393 (175bp)                       |
| Fyn                | GGCCCAGTTTGAGACCCTTC                  | *GTGTTTCCATTCCAGGTACC                 | (228bp for FynB)<br>(219bp for FynT)    |
| P301S              | GGCATCTCAGCAATGTCTCC                  | GGTATTAGCCTATGGGGGACAC                | P301S genotype(450bp)                   |
| TCRD               | CAAATGTTGCTTGCTGGTG                   | GTCAGTCGAGTGACAGTTT                   | Control (200bp)                         |

Hs = Human; Ms = Mouse

\*Indicates Fyn primer sets for fragment analysis using capillary electrophoresis, with 5' labeled 6-FAM on reverse primer
