# Supplementary material for: Isoform‐specific upregulation of FynT kinase expression is associated with tauopathy and glial activation in Alzheimer's disease and Lewy body dementias
Source: PubMed Central journal article supplement (PMC8017997; doi:10.1111/bpa.12917), 2021-01-29
Supplement: BPA-31-253-s002.pdf [file BPA-31-253-s002.pdf]

Low *et al.* Isoform-specific upregulation of FynT kinase expression is associated with tauopathy and glial activation in Alzheimer's disease and Lewy body dementias

Supplementary Fig. S1

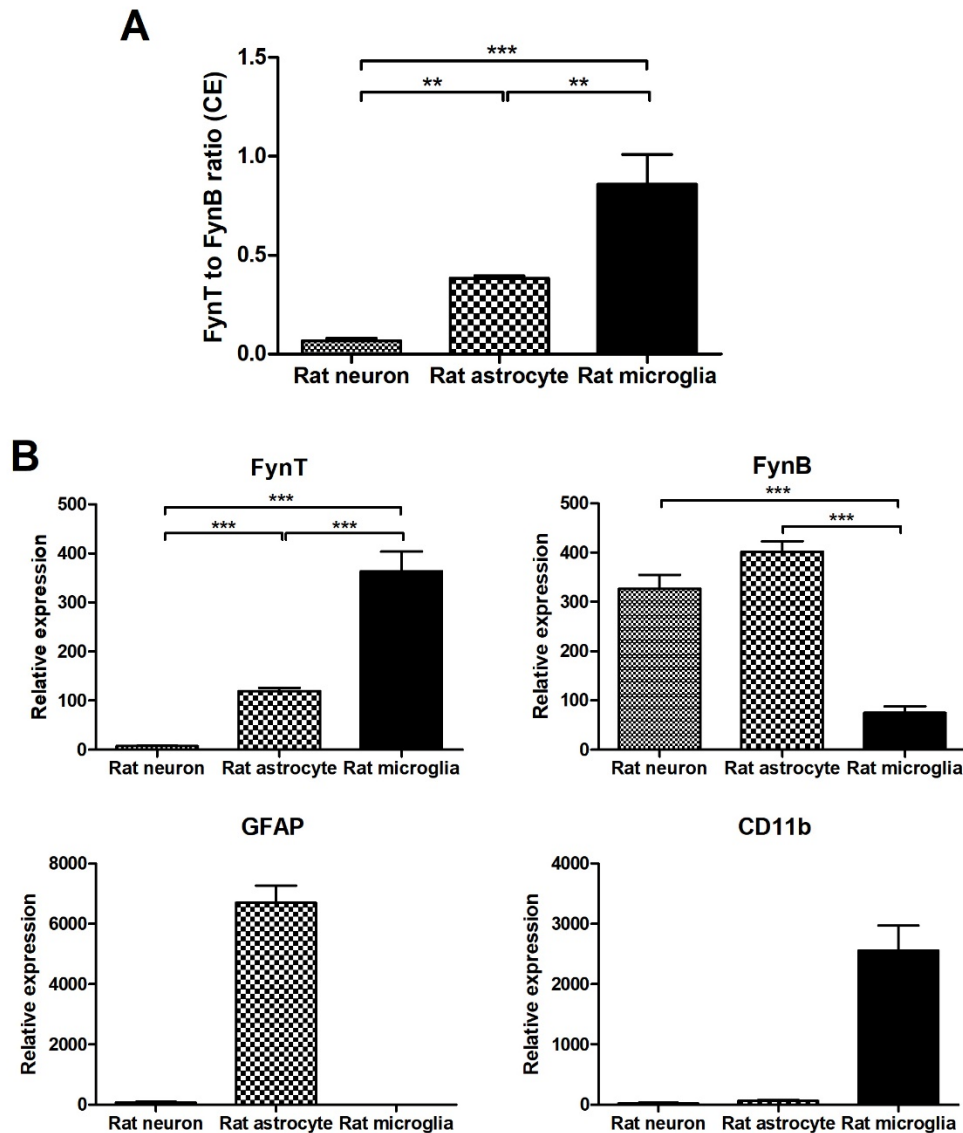

**Figure S1. Higher proportions of FynT expression in rat primary microglia cells.** A. Endogenous FynT to FynB ratios were determined by RT-PCR followed by CE (see Methods) in rat primary neurons, astrocytes and microglia cells. Data are mean  $\pm$  S.E.M of n=3-6 independent isolations of each primary culture. B. FynT and FynB, GFAP and CD11b expression were determined by real-time RT-PCR in primary neurons (n=6), astrocytes (n=11) and microglia cells (n=5).

\*\*p<0.01, \*\*\*p<0.001, significant pairwise differences between diagnostic groups by one-way ANOVA with *post-hoc* Bonferroni's tests.
